# Supplementary material for: High expression of COMMD7 is an adverse prognostic factor in acute myeloid leukemia
Source: publisher site journal article supplement (doi:10.18632/aging.202901), 2021-04-23
Supplement: Supplementary file [file aging-v13i8-202901-supplementary-material-SD5.pdf]

## SUPPLEMENTARY TABLE

Supplementary Table 4. Pathway and process enrichment analysis of Protein-protein interaction network and MCODE from Metascape.

| GO                   | Description                                                      | Log10 ( <i>P</i> ) |
|----------------------|------------------------------------------------------------------|--------------------|
| <b>R-HSA-9675108</b> | Nervous system development                                       | -13.3              |
| <b>R-HSA-9006934</b> | Signaling by Receptor Tyrosine Kinases                           | -13.0              |
| <b>GO:0007169</b>    | transmembrane receptor protein tyrosine kinase signaling pathway | -12.6              |
