# Supplementary material for: High expression of COMMD7 is an adverse prognostic factor in acute myeloid leukemia
Source: Aging (Albany NY). 2021 Apr 23;13(8):11988–2006. doi: 10.18632/aging.202901 (PMC8109082; doi:10.18632/aging.202901)
Supplement: Supplementary Table 1 [file aging-13-202901-s002.xls]

## Sheet: 工作表1
Supplementary Table 1. GO and KEGG enrichment analysis of DEGs between COMMD7 high- and low- expression groups.
ONTOLOGY	ID	Description	GeneRatio	BgRatio	pvalue	p.adjust	qvalue	geneID	Count
BP	GO:0007389	pattern specification process	27/234	446/18670	1.42e-11	2.72e-08	2.22e-08	NRP1/HOXB6/HOXB5/SIX3/GLI2/IRX1/NRP2/UNCX/HOXA11/COBL/WLS/ROBO1/WNT7B/HOXB8/SOSTDC1/DLL3/BMP5/FGFR2/LMX1B/TBX18/MYF6/NKX3-2/SIX1/FOXF1/TDRD5/HOXD8/HOXD9	27
BP	GO:0048568	embryonic organ development	25/234	428/18670	1.81e-10	1.47e-07	1.2e-07	HOXB6/HOXB5/IGF2/SIX3/GLI2/TPO/HOXA11/COBL/WNT7B/HOXB8/TWIST1/EFEMP1/BMP5/FRZB/FGFR2/YAP1/EGFR/PRRX1/SIX4/NKX3-2/SIX1/FOXF1/FOXF2/KRT19/HOXD9	25
BP	GO:0048732	gland development	24/234	434/18670	1.28e-09	8.34e-07	6.79e-07	IRF6/NRP1/NKX2-3/IGF2/SIX3/CCND1/GLI2/ASS1/COBL/WLS/ROBO1/WNT7B/SOSTDC1/APLN/FRZB/FGFR2/SNAI2/EGFR/ID4/SIX4/SIX1/FOXF1/CRH/HOXD9	24
BP	GO:0003002	regionalization	24/234	351/18670	1.67e-11	2.72e-08	2.22e-08	NRP1/HOXB6/HOXB5/SIX3/GLI2/IRX1/NRP2/HOXA11/COBL/WLS/ROBO1/WNT7B/HOXB8/SOSTDC1/DLL3/FGFR2/LMX1B/TBX18/MYF6/SIX1/FOXF1/TDRD5/HOXD8/HOXD9	24
BP	GO:0060485	mesenchyme development	21/234	278/18670	5.19e-11	5.64e-08	4.59e-08	NRP1/COL1A1/NRP2/ROBO1/SEMA6D/TWIST1/DLL3/BMP5/FRZB/FGFR2/SNAI2/YAP1/PDPN/EDNRA/EDN3/SIX4/EPHA3/SIX1/FOXF1/FOXF2/TMEM100	21
BP	GO:0048562	embryonic organ morphogenesis	18/234	288/18670	2.56e-08	1.39e-05	1.13e-05	HOXB6/HOXB5/SIX3/GLI2/HOXA11/HOXB8/TWIST1/EFEMP1/FRZB/FGFR2/YAP1/PRRX1/SIX4/NKX3-2/SIX1/FOXF1/FOXF2/HOXD9	18
BP	GO:0048705	skeletal system morphogenesis	16/234	239/18670	6.07e-08	2.31e-05	1.88e-05	HOXB6/COL1A1/HOXB5/COL6A3/UNCX/HOXA11/MGP/HOXB8/TWIST1/FGFR2/PRRX1/SIX4/NKX3-2/SIX1/HOXD8/HOXD9	16
BP	GO:0048706	embryonic skeletal system development	12/234	126/18670	6.27e-08	2.31e-05	1.88e-05	HOXB6/COL1A1/HOXB5/HOXA11/HOXB8/TWIST1/FGFR2/PRRX1/SIX4/NKX3-2/SIX1/HOXD9	12
CC	GO:0062023	collagen-containing extracellular matrix	23/240	406/19717	1.07e-09	2.91e-07	2.61e-07	ELANE/COL1A1/COL6A3/COL1A2/COL3A1/FBLN1/LAMC3/COL4A2/F12/COL4A1/MXRA5/SPARCL1/LAMA4/ANXA8/MGP/EFEMP1/FGFR2/POSTN/SMOC2/ADIPOQ/EGFLAM/AZGP1/F9	23
CC	GO:0034702	ion channel complex	12/240	301/19717	0.000337451	0.0114733	0.0103011	GABRE/SHANK1/SCN2A/CACNG4/CHRNA6/GABRD/KCNQ3/LRRC38/ABCC8/ANO1/TRPC4/GABRR3	12
CC	GO:0005581	collagen trimer	9/240	87/19717	1.13e-06	0.000154336	0.000138568	COL1A1/COL6A3/COL1A2/COL3A1/COL4A2/COL4A1/COLEC12/C1QL1/ADIPOQ	9
CC	GO:0005604	basement membrane	7/240	95/19717	0.000161425	0.00878154	0.00788435	FBLN1/LAMC3/COL4A2/COL4A1/LAMA4/SMOC2/EGFLAM	7
CC	GO:0044420	extracellular matrix component	6/240	51/19717	3.48e-05	0.0023665	0.00212472	COL1A1/COL1A2/COL3A1/FBLN1/COL4A2/COL4A1	6
CC	GO:0098644	complex of collagen trimers	5/240	19/19717	2.59e-06	0.000235075	0.000211058	COL1A1/COL1A2/COL3A1/COL4A2/COL4A1	5
CC	GO:0098643	banded collagen fibril	3/240	11/19717	0.000273406	0.0106238	0.00953838	COL1A1/COL1A2/COL3A1	3
CC	GO:0005583	fibrillar collagen trimer	3/240	11/19717	0.000273406	0.0106238	0.00953838	COL1A1/COL1A2/COL3A1	3
MF	GO:0019199	transmembrane receptor protein kinase activity	9/213	79/17697	4.44e-07	9.11e-05	7.86e-05	NRP1/NRP2/SOSTDC1/EFEMP1/FGFR2/NTRK3/EGFR/ROS1/EPHA3	9
MF	GO:0004714	transmembrane receptor protein tyrosine kinase activity	8/213	62/17697	7.47e-07	0.000102135	8.81e-05	NRP1/NRP2/EFEMP1/FGFR2/NTRK3/EGFR/ROS1/EPHA3	8
MF	GO:0048407	platelet-derived growth factor binding	4/213	11/17697	6.3e-06	0.000645905	0.000557187	COL1A1/COL1A2/COL3A1/COL4A1	4
MF	GO:0030020	extracellular matrix structural constituent conferring tensile strength	6/213	41/17697	8.96e-06	0.000735009	0.000634052	COL1A1/COL6A3/COL1A2/COL3A1/COL4A2/COL4A1	6
MF	GO:0048018	receptor ligand activity	17/213	482/17697	7.78e-05	0.00444454	0.00383406	IGF2/FGF13/BMP3/TAFA5/WNT7B/SEMA6D/EFEMP1/APLN/BMP5/CXCL14/LEP/ADIPOQ/EDN3/CCL19/FGF23/CRH/NTS	17
MF	GO:0001228	DNA-binding transcription activator activity, RNA polymerase II-specific	16/213	439/17697	8.67e-05	0.00444454	0.00383406	IRF6/ST18/HOXB5/SIX3/POU4F1/GLI2/RORB/TBX18/MYT1L/EGR4/SIX4/MYF6/SIX1/FOXF1/HOXD8/FOXF2	16
MF	GO:0008201	heparin binding	8/213	169/17697	0.00102968	0.0281445	0.0242787	ELANE/NRP1/NRP2/PCOLCE2/SLIT3/FGFR2/POSTN/SMOC2	8
MF	GO:0022838	substrate-specific channel activity	12/213	428/17697	0.00582032	0.0960125	0.0828246	GABRE/SCN2A/CACNG4/CHRNA6/GABRD/KCNQ3/KCNK13/LRRC38/ABCC8/ANO1/TRPC4/GABRR3	12
KEGG	hsa04512	ECM-receptor interaction	1992-09-01	88/8037	6.18e-07	0.000105002	9.43e-05	COL1A1/COL6A3/COL1A2/LAMC3/COL4A2/COL4A1/LAMA4/TNN/IBSP	9
KEGG	hsa04974	Protein digestion and absorption	1992-08-01	95/8037	1.17e-05	0.00083823	0.00075259	COL1A1/COL6A3/COL1A2/COL3A1/COL4A2/COL4A1/XPNPEP2/PGA3	8
KEGG	hsa04510	Focal adhesion	1992-11-01	199/8037	1.52e-05	0.00083823	0.00075259	COL1A1/COL6A3/COL1A2/CCND1/LAMC3/COL4A2/COL4A1/LAMA4/TNN/EGFR/IBSP	11
KEGG	hsa05146	Amoebiasis	1992-08-01	102/8037	1.97e-05	0.00083823	0.00075259	COL1A1/COL1A2/COL3A1/LAMC3/COL4A2/COL4A1/LAMA4/CD1B	8
KEGG	hsa04151	PI3K-Akt signaling pathway	14/92	354/8037	4.41e-05	0.0015009	0.00134755	COL1A1/COL6A3/COL1A2/IGF2/CCND1/LAMC3/COL4A2/COL4A1/LAMA4/TNN/FGFR2/EGFR/IBSP/FGF23	14
KEGG	hsa05165	Human papillomavirus infection	1992-12-01	330/8037	0.000354248	0.010037	0.00901156	COL1A1/COL6A3/COL1A2/CCND1/LAMC3/COL4A2/COL4A1/LAMA4/TNN/WNT7B/EGFR/IBSP	12
KEGG	hsa04926	Relaxin signaling pathway	1992-07-01	129/8037	0.000658734	0.0159978	0.0143634	COL1A1/COL1A2/COL3A1/ADCY2/COL4A2/COL4A1/EGFR	7
KEGG	hsa04933	AGE-RAGE signaling pathway in diabetic complications	1992-06-01	100/8037	0.000960031	0.0202562	0.0181866	COL1A1/COL1A2/COL3A1/CCND1/COL4A2/COL4A1	6
