# Supplementary material for: High expression of COMMD7 is an adverse prognostic factor in acute myeloid leukemia
Source: Aging (Albany NY). 2021 Apr 23;13(8):11988–2006. doi: 10.18632/aging.202901 (PMC8109082; doi:10.18632/aging.202901)
Supplement: Supplementary Table 2 [file aging-13-202901-s003.xls]

## Sheet: Table S2 GSEA（已筛选）.csv
Supplementary Table 2. GSEA enrichment analysis of DEGs between COMMD7 high- and low- expression groups.
ID	setSize	enrichmentScore	NES	pvalue	p.adjust	FDR	rank	leading_edge	core_enrichment
VERHAAK_AML_WITH_NPM1_MUTATED_DN	240	-0.549	-1.78	<0.001	0.01	0.007	6208	tags=39%, list=12%, signal=34%	BAALC/AGTPBP1/MMP9/MYH11/MAN1A1/MEF2A/IFI44L/LHFPL2/PRAME/HLA-DQA1/AKAP2/CCND2/CD1C/ITM2A/TCN1/MEST/TRIB2/CD19/LRP3/CD2/FZD2/MREG/CSF3R/TM6SF1/TACSTD2/BAIAP3/RHOBTB3/STK32B/AK4/PDE3B/DCHS1/SERINC5/CCR2/TKTL1/TNFRSF21/NCAM1/UGCG/CD3D/HGF/RPS6KA2/BLNK/DNTT/FOXO1/SERPINF1/SERPING1/GPM6B/PALM/PDE4B/TPSAB1/LTF/MST1/TSPAN7/LPAR6/FAM171A1/PXDN/VEGFA/KRT1/VLDLR/IL5RA/PCDHGC3/LAMC1/CLEC5A/RETN/CYP2E1/MPO/…
ROSS_AML_WITH_PML_RARA_FUSION	77	-0.578	-1.733	<0.001	0.01	0.007	6827	tags=29%, list=13%, signal=25%	MARC2/FNDC3B/AGRN/PDE3B/HGF/SERPING1/CERS4/MST1/CPA3/LTK/PXDN/TLE1/MPO/CST7/COL2A1/PTGDS/AFF2/FGF13/PGBD5/MEG3/ANXA8/RASL12
ROSS_AML_WITH_AML1_ETO_FUSION	73	-0.539	-1.607	0.002	0.02	0.015	10473	tags=34%, list=20%, signal=27%	BAALC/MAN1A1/VAMP5/PRAME/TCN1/CD19/EPCAM/WFDC1/ACSM3/BAIAP3/STK32B/RASAL1/PALM/IL5RA/CLEC5A/PSD3/ITGB4/PTGIR/TRH/CACNA2D2/CAV1/CCND1/ROBO1/POU4F1/RUNX1T1
ROSS_AML_WITH_CBFB_MYH11_FUSION	51	-0.565	-1.614	0.003	0.025	0.018	14632	tags=59%, list=28%, signal=42%	CTSS/CLEC4A/IL10RA/CEBPD/S100A8/CYBB/MEGF9/SLC7A7/CLEC7A/CD52/MYH11/MEF2A/S100A9/CD1C/KCTD12/KIF17/CCR2/IGKV1D-17/GIMAP4/QPCT/LPAR1/CD1E/AK5/SPARC/PLBD1/CLEC10A/MTMR11/TGFBI/NRP1/ST18
BIOCARTA_MAPK_PATHWAY	81	0.414	1.734	0.003	0.027	0.02	11286	tags=40%, list=22%, signal=31%	CEBPA/TGFB1/MAPK12/MAP3K6/MAPK11/MAP3K10/NFKBIA/RPS6KA1/HRAS/MAP4K1/MAP3K11/TRADD/ELK1/RELA/RPS6KA4/MAPK3/MAP2K3/MAP4K2/MAP2K2/MKNK2/MAP3K14/MAPKAPK3/RPS6KB2/DAXX/TRAF2/MAP3K5/MAP2K7/MAPKAPK2/MAP3K8/RAPGEF2/MAPK1/MYC
REACTOME_BETA_CATENIN_INDEPENDENT_WNT_SIGNALING	142	0.332	1.522	0.004	0.031	0.023	11711	tags=49%, list=23%, signal=38%	FZD8/PRICKLE1/FZD6/CAMK2A/PLCB2/RAC2/CLTB/PDE6B/DVL1/UBC/PFN1/PSMD8/NFATC1/GNB3/PSMB10/ITPR3/DVL2/AP2M1/PSMB4/PARD6A/GNB2/AC139530.1/PSMB6/UBA52/PSME1/UBB/PSMD2/MOV10/PSMA7/PSMD4/PSMB8/PSMD7/PSME2/PSMB9/SCRIB/RAC3/PSMF1/PSMA5/NLK/PSMD13/PSMD3/PSMB1/AP2B1/PSMC4/PSMC3/AP2S1/PSMB5/CLTA/AP2A1/PSMC5/PSMB2/RPS27A/FZD3/PSMC2/FZD1/PSMA4/FZD7/PSME3/GNB5/PSMD1/MYC/PSMA1/PSMD14/PLCB3/ROR2/DVL3/RHOA/GNB1/PSM…
REACTOME_SIGNALING_BY_HEDGEHOG	147	0.378	1.735	0.005	0.034	0.025	11810	tags=52%, list=23%, signal=40%	GLI2/ADCY2/NOTUM/ADCY7/ULK3/UBC/IQCE/PRKAR1B/PRKAR2B/PSMD8/PSMB10/ADCY4/IFT140/ADCY6/PSMB4/PSMB6/ADCY3/IFT57/ADCY1/UBA52/TUBA1A/PSME1/UBB/PSMD2/PSMA7/TUBB2A/PSMD4/PSMB8/PSMD7/PSME2/PSMB9/FUZ/TUBA1B/PSMF1/PSMA5/PSMD13/TUBA1C/PSMD3/PRKACB/PSMB1/PSMC4/HHAT/PSMC3/TUBB2B/ARRB1/PSMB5/WDR19/MKS1/TUBA3D/PSMC5/PSMB2/SUFU/TUBB4B/VCP/WDR35/INTU/KIF3A/GLI3/RPS27A/PSMC2/DISP2/TUBB6/GNAS/PSMA4/PSME3/SYVN1/SPOP…
BIOCARTA_RAS_PATHWAY	22	0.605	1.922	0.003	0.025	0.018	12482	tags=59%, list=24%, signal=45%	RALGDS/BAD/HRAS/ELK1/RELA/AKT1/CASP9/MAPK3/FOXO4/CDC42/RALA/RHOA/RALBP1
BOQUEST_STEM_CELL_UP	256	-0.588	-1.911	<0.001	0.01	0.007	4438	tags=36%, list=9%, signal=33%	SGCD/C1S/FBLN5/PPL/SERPINF1/FXYD1/PDGFRL/ABCA6/THBS2/IRS1/LUM/SERPINA3/SETBP1/GPC4/NPY1R/LTBP2/ANG/LPAR1/ROR1/OLFML2B/PLN/EFS/SERPINA5/PCDH9/MFAP4/PDLIM3/MFAP5/FLRT2/CAPN6/AXL/OLFML3/ITGA8/HTRA1/RNASE4/FMOD/IGFBP3/ADH1C/CES1/ABCA8/APOE/ATP1A2/PRELP/CDO1/PTPN13/FST/DCN/WNT5A/PLBD1/PDGFRA/GRIA3/ISLR/APOD/COL16A1/NOVA1/C7/NTRK2/AOX1/SOX9/DDR2/TNC/ANK2/SLIT2/COL14A1/PTGDS/CHL1/PTPRG/DPT/CXCL12/ADH1B/…
REACTOME_MACROAUTOPHAGY	85	0.469	1.978	0.002	0.019	0.014	13544	tags=58%, list=26%, signal=43%	ATG4D/SRC/LAMTOR4/UBC/LAMTOR2/WDR45/SQSTM1/CHMP4C/LAMTOR5/LAMTOR1/MLST8/PRKAB2/RRAGA/CHMP4B/ULK1/UBA52/CSNK2B/RRAGB/UBB/CHMP2A/TOMM40/PINK1/DYNLL1/GABARAPL2/MAP1LC3A/ATG4B/CHMP6/ATG4A/PRKAB1/RPS27A/MAP1LC3B/TOMM7/TSC2/FUNDC1/MTOR/ATG9A/AMBRA1/WIPI2/ATG3/BECN1/PRKAG1/TOMM22/CHMP2B/MFN2/DYNLL2/VDAC1/LAMTOR3/ATG13/WDR45B
NABA_CORE_MATRISOME	265	-0.571	-1.857	<0.001	0.01	0.007	6308	tags=38%, list=12%, signal=33%	HAPLN1/CRIM1/LGI2/EPYC/LAMC2/PRG4/NELL1/AGRN/AMELX/COL4A4/VWA5B1/NELL2/FBLN2/HAPLN4/FBLN5/COL23A1/LAMA1/FBN3/EMILIN1/TSPEAR/THBS2/COL22A1/HMCN1/LUM/EFEMP2/NID1/LTBP2/LAMB1/EMILIN3/COL11A1/COL21A1/COL8A2/PXDN/MMRN2/THBS4/FNDC1/FRAS1/MFAP4/FBN2/MFAP5/GLDN/LAMC1/MEPE/BMPER/FMOD/PRG3/SPARC/THSD4/IGFBP3/VIT/NDNF/LAMB4/PRELP/DCN/MATN3/RSPO1/TINAGL1/CILP2/NTNG2/SMOC1/COL16A1/IGFBP5/IGFBP4/PODN/COL5A3/CO…
REACTOME_EXTRACELLULAR_MATRIX_ORGANIZATION	296	-0.492	-1.607	<0.001	0.01	0.007	4610	tags=27%, list=9%, signal=25%	A2M/PLOD2/NCAM1/FBLN2/KDR/FBLN5/COL23A1/ADAM19/LAMA1/FBN3/KLK2/EMILIN1/TPSAB1/COL22A1/ADAMTS1/LUM/TTR/EFEMP2/NID1/ITGA11/ADAMTS4/LTBP2/KLKB1/LAMB1/EMILIN3/COL11A1/COL21A1/COL8A2/PXDN/MFAP4/FBN2/MFAP5/CAPN6/LAMC1/ITGA8/HTRA1/FMOD/SPARC/TLL2/ITGB4/ADAMTS3/MMP1/TLL1/DCN/MATN3/COL16A1/LRP4/COL5A3/MUSK/MMP14/ITGB6/COL2A1/COL8A1/DDR2/VCAM1/BMP4/TNC/COL14A1/ADAMTS9/COL12A1/LOXL4/COL15A1/BGN/MMP13/COLGAL…
