# Supplementary material for: High expression of COMMD7 is an adverse prognostic factor in acute myeloid leukemia
Source: Aging (Albany NY). 2021 Apr 23;13(8):11988–2006. doi: 10.18632/aging.202901 (PMC8109082; doi:10.18632/aging.202901)
Supplement: Supplementary Table 3 [file aging-13-202901-s004.xls]

## Sheet: Table S3 PPI网络构建.csv
Supplementary Table 3. PPI analysis of DEGs by STRING.
node1	node2	node1_external_id	node2_external_id	neighborhood_on_chromosome	gene_fusion	phylogenetic_cooccurrence	coexpression	experimentally_determined_interaction	database_annotated	automated_textmining	combined_score
COL1A2	COL1A1	ENSP00000297268	ENSP00000225964	0	0	0.018606	0.991	0.454	0.9	0.039816	0.999
COL4A1	COL4A2	ENSP00000364979	ENSP00000353654	0	0	0.049362	0.963	0.886	0.9	0.09918	0.999
ROBO1	SLIT3	ENSP00000420321	ENSP00000332164	0	0	0	0.061	0.726	0.9	0.932	0.998
YAP1	TEAD1	ENSP00000478927	ENSP00000435233	0	0	0	0.423	0.829	0.9	0.893	0.998
COL3A1	COL1A2	ENSP00000304408	ENSP00000297268	0	0	0.0308	0.946	0.109	0.9	0.06013	0.995
COL3A1	COL1A1	ENSP00000304408	ENSP00000225964	0	0	0.021511	0.944	0	0.9	0.044149	0.994
EDN3	EDNRA	ENSP00000337128	ENSP00000315011	0	0	0	0	0.454	0.9	0.837	0.99
ADIPOQ	FABP4	ENSP00000389814	ENSP00000256104	0	0	0	0.186	0	0.9	0.879	0.989
COL1A2	COL6A3	ENSP00000297268	ENSP00000295550	0	0	0	0.839	0	0.9	0.295849	0.988
HOXB6	HOXB5	ENSP00000420009	ENSP00000239151	0	0	0	0.7	0.96	0	0.10875	0.988
COL3A1	COL6A3	ENSP00000304408	ENSP00000295550	0	0	0	0.802	0	0.9	0.30888	0.985
FGFR2	FGF23	ENSP00000410294	ENSP00000237837	0	0	0	0.049	0.65	0.9	0.595	0.984
COL6A3	COL1A1	ENSP00000295550	ENSP00000225964	0	0	0	0.77	0	0.9	0.288402	0.982
TDRD5	TDRD9	ENSP00000406052	ENSP00000387303	0	0	0	0.086	0.261	0.72	0.909	0.98
ADIPOQ	LEP	ENSP00000389814	ENSP00000312652	0	0	0	0.149	0	0	0.971	0.975
COL4A1	COL1A1	ENSP00000364979	ENSP00000225964	0	0	0.119658	0.575	0	0.9	0.222852	0.969
COL4A1	COL1A2	ENSP00000364979	ENSP00000297268	0	0	0.122348	0.566	0.093	0.9	0.199728	0.969
COL4A1	COL3A1	ENSP00000364979	ENSP00000304408	0	0	0.116879	0.57	0	0.9	0.206873	0.968
TDRD9	TDRD1	ENSP00000387303	ENSP00000251864	0	0	0	0.061	0.412	0.9	0.42458	0.965
COL4A2	COL3A1	ENSP00000353654	ENSP00000304408	0	0	0.108108	0.53	0	0.9	0.18117	0.963
COL4A2	COL1A1	ENSP00000353654	ENSP00000225964	0	0	0.114156	0.509	0	0.9	0.189656	0.962
F12	F9	ENSP00000253496	ENSP00000218099	0	0	0.130398	0.502	0	0.9	0.169641	0.961
WLS	WNT7B	ENSP00000346829	ENSP00000341032	0	0	0	0.05	0.132	0.9	0.515	0.954
COL4A2	COL1A2	ENSP00000353654	ENSP00000297268	0	0	0.120834	0.353	0.093	0.9	0.178458	0.953
EDNRA	EGFR	ENSP00000315011	ENSP00000275493	0	0	0	0.167	0.084	0.9	0.298	0.939
ROBO1	NRP1	ENSP00000420321	ENSP00000265371	0	0	0	0.061	0	0.9	0.406	0.939
TREM2	SEMA6D	ENSP00000362205	ENSP00000324857	0	0	0	0	0	0.9	0.397	0.937
COL4A1	COL6A3	ENSP00000364979	ENSP00000295550	0	0	0	0.209	0	0.9	0.25199	0.937
COL4A2	COL6A3	ENSP00000353654	ENSP00000295550	0	0	0	0.197	0	0.9	0.245526	0.936
MUC16	MSLN	ENSP00000381008	ENSP00000372313	0	0	0	0.136	0.379	0	0.891	0.936
EFEMP1	FBLN1	ENSP00000378058	ENSP00000331544	0	0	0	0.16	0.12	0.9	0.19852	0.935
COL3A1	PCOLCE2	ENSP00000304408	ENSP00000295992	0	0	0	0.063	0	0.9	0.356	0.934
TEAD1	VGLL3	ENSP00000435233	ENSP00000381436	0	0	0	0.092	0.365	0	0.893	0.933
COL1A2	PCOLCE2	ENSP00000297268	ENSP00000295992	0	0	0	0.062	0	0.9	0.311	0.929
PCOLCE2	COL1A1	ENSP00000295992	ENSP00000225964	0	0	0	0.083	0	0.9	0.269	0.927
EDNRA	NTS	ENSP00000315011	ENSP00000256010	0	0	0	0	0.263	0.9	0.096	0.927
LAMC3	LAMA4	ENSP00000354360	ENSP00000230538	0	0	0	0.062	0	0.9	0.244167	0.925
YAP1	EGFR	ENSP00000478927	ENSP00000275493	0	0	0	0.373	0.401	0	0.815	0.924
TFF2	EGFR	ENSP00000291526	ENSP00000275493	0	0	0	0	0	0.9	0.254	0.922
EGFR	CCND1	ENSP00000275493	ENSP00000227507	0	0	0	0.2	0.157	0	0.886	0.917
GFRA1	GFRA3	ENSP00000347591	ENSP00000274721	0	0	0	0.062	0	0.9	0.14824	0.916
GLI2	CCND1	ENSP00000390436	ENSP00000227507	0	0	0	0.098	0.05	0.8	0.552	0.913
SPARCL1	FGF23	ENSP00000414856	ENSP00000237837	0	0	0	0	0.132	0.9	0	0.909
COL4A1	IBSP	ENSP00000364979	ENSP00000226284	0	0	0	0	0	0.9	0.112	0.907
POSTN	COL3A1	ENSP00000369071	ENSP00000304408	0	0	0	0.798	0	0	0.561	0.907
IGF2	CCND1	ENSP00000391826	ENSP00000227507	0	0	0	0.092	0	0	0.901	0.907
ADCY2	CRH	ENSP00000342952	ENSP00000276571	0	0	0	0.078	0	0.9	0.068	0.906
APLN	OXGR1	ENSP00000391800	ENSP00000298440	0	0	0	0	0	0.9	0.103	0.906
FGFR2	FGF13	ENSP00000410294	ENSP00000322390	0	0	0	0.061	0.267	0	0.874	0.906
ADCY2	EDNRA	ENSP00000342952	ENSP00000315011	0	0	0	0.063	0.06	0.9	0.049	0.905
MSLN	LY6K	ENSP00000372313	ENSP00000292430	0	0	0	0.069	0	0.9	0.066	0.905
COL4A2	IBSP	ENSP00000353654	ENSP00000226284	0	0	0	0	0	0.9	0.083	0.904
COL4A2	F12	ENSP00000353654	ENSP00000253496	0	0	0	0	0.063	0.9	0.043	0.902
COL4A1	F12	ENSP00000364979	ENSP00000253496	0	0	0	0	0.063	0.9	0.043	0.902
TARM1	CLEC4D	ENSP00000439454	ENSP00000299665	0	0	0	0.061	0	0.9	0	0.902
EDN3	NTS	ENSP00000337128	ENSP00000256010	0	0	0	0	0	0.9	0.051	0.901
CCL19	OXGR1	ENSP00000308815	ENSP00000298440	0	0	0	0	0	0.9	0	0.9
ADCY2	OXGR1	ENSP00000342952	ENSP00000298440	0	0	0	0	0	0.9	0.043	0.9
ADCY2	CCL19	ENSP00000342952	ENSP00000308815	0	0	0	0	0	0.9	0	0.9
XPNPEP2	LY6K	ENSP00000360147	ENSP00000292430	0	0	0	0	0	0.9	0	0.9
MSLN	FGF23	ENSP00000372313	ENSP00000237837	0	0	0	0	0	0.9	0	0.9
MSLN	XPNPEP2	ENSP00000372313	ENSP00000360147	0	0	0	0	0	0.9	0	0.9
MDGA2	LY6K	ENSP00000382178	ENSP00000292430	0	0	0	0	0	0.9	0	0.9
MDGA2	XPNPEP2	ENSP00000382178	ENSP00000360147	0	0	0	0	0	0.9	0	0.9
MDGA2	MSLN	ENSP00000382178	ENSP00000372313	0	0	0	0	0	0.9	0	0.9
APLN	CCL19	ENSP00000391800	ENSP00000308815	0	0	0	0	0	0.9	0.046	0.9
APLN	ADCY2	ENSP00000391800	ENSP00000342952	0	0	0	0	0	0.9	0	0.9
SPARCL1	MSLN	ENSP00000414856	ENSP00000372313	0	0	0	0	0	0.9	0.041	0.9
NGB	CYGB	ENSP00000298352	ENSP00000293230	0	0	0	0.06	0	0	0.897	0.899
SNAI2	TWIST1	ENSP00000380034	ENSP00000242261	0	0	0	0.152	0	0	0.886	0.899
TDRD5	TDRD1	ENSP00000406052	ENSP00000251864	0	0	0	0.056	0.412	0.72	0.375004	0.893
HOXB5	HOXB8	ENSP00000239151	ENSP00000239144	0	0	0	0.562	0.731	0	0.131112	0.892
POSTN	COL1A2	ENSP00000369071	ENSP00000297268	0	0	0	0.737	0	0	0.534	0.872
POSTN	COL1A1	ENSP00000369071	ENSP00000225964	0	0	0	0.663	0	0	0.613	0.864
NRP2	SEMA6D	ENSP00000353582	ENSP00000324857	0	0	0	0.065	0.164	0	0.826	0.852
SEMA6D	NRP1	ENSP00000324857	ENSP00000265371	0	0	0	0.061	0.195	0	0.818	0.851
LEP	EGFR	ENSP00000312652	ENSP00000275493	0	0	0	0	0	0.6	0.641	0.85
SNAI2	CCND1	ENSP00000380034	ENSP00000227507	0	0	0	0.142	0	0	0.83	0.848
SNAI2	EGFR	ENSP00000380034	ENSP00000275493	0	0	0	0.298	0	0	0.79	0.846
HOXB6	HOXB8	ENSP00000420009	ENSP00000239144	0	0	0	0.351	0.731	0	0.139476	0.842
NRP2	NRP1	ENSP00000353582	ENSP00000265371	0	0	0	0.098	0.379	0.72	0.059964	0.839
CD207	CD1B	ENSP00000386378	ENSP00000357150	0	0	0	0	0	0	0.839	0.839
COL3A1	CDH11	ENSP00000304408	ENSP00000268603	0	0	0	0.782	0	0	0.285	0.837
IGF2	EGFR	ENSP00000391826	ENSP00000275493	0	0	0	0.088	0	0.6	0.579	0.833
LEP	CRH	ENSP00000312652	ENSP00000276571	0	0	0	0	0	0	0.819	0.82
HOXB6	HOXD9	ENSP00000420009	ENSP00000249499	0	0	0	0.136	0.735	0	0.135716	0.792
HOXD9	HOXB5	ENSP00000249499	ENSP00000239151	0	0	0	0.112	0.731	0	0.1641	0.79
POSTN	CDH11	ENSP00000369071	ENSP00000268603	0	0	0	0.617	0	0	0.456	0.783
LEP	CCND1	ENSP00000312652	ENSP00000227507	0	0	0	0	0	0	0.775	0.775
SLC51B	SLC10A2	ENSP00000335292	ENSP00000245312	0	0	0	0.083	0	0	0.763	0.773
POSTN	COL6A3	ENSP00000369071	ENSP00000295550	0	0	0	0.587	0	0	0.472	0.773
COL1A2	CDH11	ENSP00000297268	ENSP00000268603	0	0	0	0.686	0	0	0.297	0.77
YAP1	CCND1	ENSP00000478927	ENSP00000227507	0	0	0	0.317	0	0	0.657	0.756
FGF13	EGFR	ENSP00000322390	ENSP00000275493	0	0	0	0	0	0	0.742	0.742
KCNQ3	SCN2A	ENSP00000373648	ENSP00000364586	0	0	0	0.201	0.069	0	0.672	0.735
ID4	MYF6	ENSP00000367972	ENSP00000228641	0	0	0	0	0.695	0	0.15	0.729
EFEMP1	EGFR	ENSP00000378058	ENSP00000275493	0	0	0	0.33	0.085	0	0.588	0.726
CRH	NTS	ENSP00000276571	ENSP00000256010	0	0	0	0.061	0	0	0.718	0.724
FGFR2	TWIST1	ENSP00000410294	ENSP00000242261	0	0	0	0.061	0	0	0.715	0.721
WNT7B	FRZB	ENSP00000341032	ENSP00000295113	0	0	0	0	0.262	0	0.636	0.72
FGFR2	IGF2	ENSP00000410294	ENSP00000391826	0	0	0	0.057	0	0.6	0.315	0.719
GABRR3	CHAT	ENSP00000481321	ENSP00000337103	0	0	0	0.062	0	0	0.713	0.719
LEP	FABP4	ENSP00000312652	ENSP00000256104	0	0	0	0.063	0	0	0.709	0.716
GABRR3	GABRE	ENSP00000481321	ENSP00000359353	0	0	0	0	0.333	0.54	0.11322	0.714
PTPRQ	PCDH15	ENSP00000482885	ENSP00000363068	0	0	0	0	0.26	0	0.629	0.714
GABRD	GABRE	ENSP00000367848	ENSP00000359353	0	0	0	0	0.333	0.54	0.107402	0.713
CDH11	COL1A1	ENSP00000268603	ENSP00000225964	0	0	0	0.535	0	0	0.407	0.712
SIM1	LEP	ENSP00000358210	ENSP00000312652	0	0	0	0	0	0	0.709	0.71
HOXD8	HOXD9	ENSP00000315949	ENSP00000249499	0	0	0	0.539	0.185	0	0.243704	0.702
POSTN	TWIST1	ENSP00000369071	ENSP00000242261	0	0	0	0.168	0	0	0.65	0.697
YAP1	SNAI2	ENSP00000478927	ENSP00000380034	0	0	0	0.214	0	0	0.625	0.693
EGFR	NRP1	ENSP00000275493	ENSP00000265371	0	0	0	0.098	0.105	0	0.64	0.685
IBSP	COL1A1	ENSP00000226284	ENSP00000225964	0	0	0	0.055	0	0	0.676	0.681
LEP	FGF23	ENSP00000312652	ENSP00000237837	0	0	0	0	0	0	0.681	0.681
COL6A3	BMP3	ENSP00000295550	ENSP00000282701	0	0	0	0	0.08	0	0.664	0.677
EGFR	NT5E	ENSP00000275493	ENSP00000257770	0	0	0	0.193	0	0	0.611	0.672
YAP1	VGLL3	ENSP00000478927	ENSP00000381436	0	0	0	0.072	0.085	0	0.645	0.672
APLN	ADIPOQ	ENSP00000391800	ENSP00000389814	0	0	0	0	0	0	0.67	0.67
APLN	LEP	ENSP00000391800	ENSP00000312652	0	0	0	0	0	0	0.669	0.669
GABRR3	CRH	ENSP00000481321	ENSP00000276571	0	0	0	0	0	0	0.669	0.669
HOXA13	HOXA11	ENSP00000222753	ENSP00000006015	0	0	0	0.53	0	0	0.296873	0.668
EGFR	FGF23	ENSP00000275493	ENSP00000237837	0	0	0	0	0	0.6	0.185	0.66
FBLN1	COL1A1	ENSP00000331544	ENSP00000225964	0	0	0	0.436	0.063	0	0.396	0.653
SLIT3	SEMA6D	ENSP00000332164	ENSP00000324857	0	0	0	0.096	0	0	0.63	0.651
POSTN	EGFR	ENSP00000369071	ENSP00000275493	0	0	0	0.135	0	0	0.608	0.646
ANXA8	TLE6	ENSP00000478026	ENSP00000246112	0	0	0	0	0	0	0.646	0.646
GJB2	PCDH15	ENSP00000372295	ENSP00000363068	0	0	0	0	0.064	0	0.632	0.64
FOXF2	TWIST1	ENSP00000259806	ENSP00000242261	0	0	0	0.111	0	0	0.61	0.639
ANO1	EGFR	ENSP00000347454	ENSP00000275493	0	0	0	0.146	0	0	0.594	0.639
TBX18	UNCX	ENSP00000358677	ENSP00000314480	0	0	0	0	0.19	0	0.57	0.637
VSNL1	PLCXD3	ENSP00000384719	ENSP00000367032	0	0	0	0.119	0	0	0.603	0.635
NKX3-2	FOXF1	ENSP00000371875	ENSP00000262426	0	0	0	0.085	0.111	0	0.584	0.632
ADIPOQ	PRDM16	ENSP00000389814	ENSP00000270722	0	0	0	0.062	0	0	0.618	0.626
COL1A2	MXRA5	ENSP00000297268	ENSP00000217939	0	0	0	0.533	0.082	0	0.196	0.625
NTRK3	NTS	ENSP00000354207	ENSP00000256010	0	0	0	0.062	0	0	0.611	0.62
KRT19	EGFR	ENSP00000355124	ENSP00000275493	0	0	0	0.151	0	0	0.57	0.619
PRDM16	FABP4	ENSP00000270722	ENSP00000256104	0	0	0	0	0.05	0	0.612	0.615
SNAI2	TBX18	ENSP00000380034	ENSP00000358677	0	0	0	0.139	0.05	0	0.564	0.613
COL3A1	MXRA5	ENSP00000304408	ENSP00000217939	0	0	0	0.543	0.082	0	0.15	0.612
EFEMP1	MSLN	ENSP00000378058	ENSP00000372313	0	0	0	0.081	0	0	0.59	0.607
GABRD	SCN2A	ENSP00000367848	ENSP00000364586	0	0	0	0.314	0	0	0.447	0.604
SIX1	CCND1	ENSP00000247182	ENSP00000227507	0	0	0	0.099	0	0	0.576	0.602
SNAI2	CDH11	ENSP00000380034	ENSP00000268603	0	0	0	0.202	0	0	0.514	0.596
SPARCL1	SMOC2	ENSP00000414856	ENSP00000346537	0	0	0	0.253	0	0	0.48	0.595
RUNX1T1	IRX1	ENSP00000402257	ENSP00000305244	0	0	0	0	0	0	0.593	0.593
ASPG	ASS1	ENSP00000450040	ENSP00000361471	0	0	0	0.09	0	0	0.569	0.591
COL4A2	LAMA4	ENSP00000353654	ENSP00000230538	0	0	0	0.192	0	0	0.512	0.589
IGF2	LEP	ENSP00000391826	ENSP00000312652	0	0	0	0	0	0	0.586	0.586
C6	F9	ENSP00000263413	ENSP00000218099	0	0	0	0.578	0.057	0	0	0.585
EGFR	TWIST1	ENSP00000275493	ENSP00000242261	0	0	0	0.095	0	0	0.558	0.583
TWIST1	PRRX1	ENSP00000242261	ENSP00000239461	0	0	0	0.196	0	0	0.5	0.581
XPNPEP2	F12	ENSP00000360147	ENSP00000253496	0	0	0	0.426	0.065	0	0.278	0.579
C6	F12	ENSP00000263413	ENSP00000253496	0	0	0	0.46	0.084	0	0.216	0.578
SIM1	CRH	ENSP00000358210	ENSP00000276571	0	0	0	0	0	0	0.578	0.578
SNAI2	PRRX1	ENSP00000380034	ENSP00000239461	0	0	0	0.214	0.05	0	0.479	0.577
ROBO1	SEMA6D	ENSP00000420321	ENSP00000324857	0	0	0	0.113	0	0	0.541	0.576
TREM2	DCSTAMP	ENSP00000362205	ENSP00000297581	0	0	0	0.163	0	0	0.513	0.574
GABRR3	GABRD	ENSP00000481321	ENSP00000367848	0	0	0	0	0	0.54	0.077924	0.574
GLI2	FOXF1	ENSP00000390436	ENSP00000262426	0	0	0	0.069	0.108	0	0.527	0.573
LEP	PRDM16	ENSP00000312652	ENSP00000270722	0	0	0	0	0.081	0	0.552	0.571
COL4A1	LAMA4	ENSP00000364979	ENSP00000230538	0	0	0	0.202	0	0	0.483	0.57
DUSP21	OR10H5	ENSP00000343244	ENSP00000310704	0	0	0	0	0	0	0.568	0.568
CCL19	PDPN	ENSP00000308815	ENSP00000294489	0	0	0	0	0	0	0.566	0.566
KRT19	FBLN1	ENSP00000355124	ENSP00000331544	0	0	0	0.095	0	0	0.539	0.565
GABRR3	ANO1	ENSP00000481321	ENSP00000347454	0	0	0	0	0	0.54	0.092	0.564
GABRD	NGB	ENSP00000367848	ENSP00000298352	0	0	0	0.521	0	0	0.126	0.563
POSTN	COL4A1	ENSP00000369071	ENSP00000364979	0	0	0	0.351	0	0	0.354	0.562
MGP	IBSP	ENSP00000228938	ENSP00000226284	0	0	0	0	0	0	0.56	0.56
FGF23	MGP	ENSP00000237837	ENSP00000228938	0	0	0	0	0	0	0.56	0.56
MYBPH	SIX4	ENSP00000255416	ENSP00000216513	0	0	0	0	0	0	0.56	0.56
SPARCL1	IBSP	ENSP00000414856	ENSP00000226284	0	0	0	0.136	0	0	0.511	0.56
GABRR3	NTS	ENSP00000481321	ENSP00000256010	0	0	0	0	0	0	0.558	0.558
CXCL14	CCL19	ENSP00000337065	ENSP00000308815	0	0	0	0.153	0	0	0.497	0.556
EPHA3	SEMA6D	ENSP00000337451	ENSP00000324857	0	0	0	0.096	0.059	0	0.52	0.556
SNAI2	POSTN	ENSP00000380034	ENSP00000369071	0	0	0	0.293	0	0	0.398	0.556
FABP4	CCND1	ENSP00000256104	ENSP00000227507	0	0	0	0	0	0	0.55	0.55
LAMC3	IBSP	ENSP00000354360	ENSP00000226284	0	0	0	0.061	0	0	0.54	0.549
GABRE	ANO1	ENSP00000359353	ENSP00000347454	0	0	0	0.058	0	0.54	0	0.548
VSNL1	GRK1	ENSP00000384719	ENSP00000334876	0	0	0	0.061	0.309	0	0.359	0.548
SIX1	MYF6	ENSP00000247182	ENSP00000228641	0	0	0	0.078	0	0	0.529	0.547
GLI2	SIX3	ENSP00000390436	ENSP00000260653	0	0	0	0	0.064	0	0.536	0.547
RORB	CUX2	ENSP00000366093	ENSP00000261726	0	0	0	0.09	0	0	0.519	0.544
PGBD5	MAP7D2	ENSP00000431404	ENSP00000368964	0	0	0	0.097	0	0	0.515	0.544
COL3A1	HOXA11	ENSP00000304408	ENSP00000006015	0	0	0	0.067	0.05	0	0.524	0.541
GABRD	ANO1	ENSP00000367848	ENSP00000347454	0	0	0	0.044	0	0.54	0	0.541
SNAI2	SIX1	ENSP00000380034	ENSP00000247182	0	0	0	0.127	0.055	0	0.486	0.539
SPINK2	THEG	ENSP00000425961	ENSP00000340088	0	0	0	0	0	0	0.539	0.539
SIX1	TWIST1	ENSP00000247182	ENSP00000242261	0	0	0	0.126	0	0	0.492	0.537
MSLN	EGFR	ENSP00000372313	ENSP00000275493	0	0	0	0.088	0	0	0.514	0.537
FBLN1	COL3A1	ENSP00000331544	ENSP00000304408	0	0	0	0.249	0.063	0	0.387	0.531
GABRD	PCDH18	ENSP00000367848	ENSP00000355082	0	0	0	0	0	0	0.531	0.531
GLI2	EGFR	ENSP00000390436	ENSP00000275493	0	0	0	0.118	0.157	0	0.42	0.531
YAP1	GLI2	ENSP00000478927	ENSP00000390436	0	0	0	0.159	0.185	0	0.369	0.53
BMP3	IBSP	ENSP00000282701	ENSP00000226284	0	0	0	0	0	0	0.528	0.528
C10orf128	VSTM4	ENSP00000363268	ENSP00000331062	0	0	0	0	0	0	0.526	0.526
KRT19	CCND1	ENSP00000355124	ENSP00000227507	0	0	0	0.172	0	0	0.45	0.525
MYT1L	LMX1B	ENSP00000396103	ENSP00000347684	0	0	0	0	0	0	0.525	0.525
HBZ	CCND1	ENSP00000252951	ENSP00000227507	0	0	0	0	0	0	0.523	0.523
COL4A1	FBLN1	ENSP00000364979	ENSP00000331544	0	0	0	0.203	0.063	0	0.412	0.523
SNAI2	KRT19	ENSP00000380034	ENSP00000355124	0	0	0	0.07	0	0	0.508	0.523
SCN2A	NGB	ENSP00000364586	ENSP00000298352	0	0	0	0.333	0	0	0.31	0.52
POU4F1	CHAT	ENSP00000366413	ENSP00000337103	0	0	0	0.049	0	0	0.514	0.518
COL6A3	LAMA4	ENSP00000295550	ENSP00000230538	0	0	0	0.175	0	0	0.438	0.517
EFEMP1	POSTN	ENSP00000378058	ENSP00000369071	0	0	0	0.173	0	0	0.44	0.517
FGFR2	CCND1	ENSP00000410294	ENSP00000227507	0	0	0	0.093	0	0	0.49	0.517
MSLN	PDPN	ENSP00000372313	ENSP00000294489	0	0	0	0.062	0	0	0.504	0.515
FBLN1	COL1A2	ENSP00000331544	ENSP00000297268	0	0	0	0.362	0.063	0	0.25	0.512
CCDC3	BEND7	ENSP00000368102	ENSP00000345773	0	0	0	0	0	0	0.512	0.512
ADIPOQ	COL1A2	ENSP00000389814	ENSP00000297268	0	0	0.384	0.063	0	0	0.222	0.511
IGF2	FGF13	ENSP00000391826	ENSP00000322390	0	0	0	0	0	0	0.511	0.511
SNAI2	COL1A1	ENSP00000380034	ENSP00000225964	0	0	0	0.313	0	0	0.314	0.509
XPNPEP2	ENPEP	ENSP00000360147	ENSP00000265162	0	0	0	0.127	0.064	0	0.446	0.508
POU4F1	NTRK3	ENSP00000366413	ENSP00000354207	0	0	0	0.063	0	0	0.497	0.508
NKX3-2	FOXF2	ENSP00000371875	ENSP00000259806	0	0	0	0.116	0.111	0	0.424	0.508
POSTN	MGP	ENSP00000369071	ENSP00000228938	0	0	0	0.207	0	0	0.404	0.507
CCDC3	SMOC2	ENSP00000368102	ENSP00000346537	0	0	0	0.324	0	0	0.297	0.504
MYF6	SIX4	ENSP00000228641	ENSP00000216513	0	0	0	0.064	0	0	0.491	0.503
TWIST1	CCND1	ENSP00000242261	ENSP00000227507	0	0	0	0.083	0	0	0.48	0.503
COL3A1	LAMA4	ENSP00000304408	ENSP00000230538	0	0	0	0.282	0	0	0.336	0.503
SNAI2	COL3A1	ENSP00000380034	ENSP00000304408	0	0	0	0.33	0	0	0.287	0.502
FOXF1	LAMA4	ENSP00000262426	ENSP00000230538	0	0	0	0.098	0	0	0.468	0.499
EDNRA	COL3A1	ENSP00000315011	ENSP00000304408	0	0	0	0.35	0.054	0	0.25	0.499
COL6A3	CDH11	ENSP00000295550	ENSP00000268603	0	0	0	0.391	0	0	0.21	0.498
COL1A2	LAMA4	ENSP00000297268	ENSP00000230538	0	0	0	0.243	0	0	0.362	0.497
HOXD8	HOXA11	ENSP00000315949	ENSP00000006015	0	0	0	0.287	0.185	0	0.178112	0.497
SPINK2	MAP7D2	ENSP00000425961	ENSP00000368964	0	0	0	0	0	0	0.497	0.497
POSTN	PRRX1	ENSP00000369071	ENSP00000239461	0	0	0	0.346	0	0	0.261	0.496
IGF2	IBSP	ENSP00000391826	ENSP00000226284	0	0	0	0	0	0	0.496	0.496
FGF23	IBSP	ENSP00000237837	ENSP00000226284	0	0	0	0	0	0	0.495	0.495
SIM1	ROS1	ENSP00000358210	ENSP00000357494	0	0	0	0	0.086	0	0.47	0.494
LAMA4	COL1A1	ENSP00000230538	ENSP00000225964	0	0	0	0.159	0	0	0.421	0.493
POSTN	IBSP	ENSP00000369071	ENSP00000226284	0	0	0	0	0	0	0.493	0.493
POSTN	COL4A2	ENSP00000369071	ENSP00000353654	0	0	0	0.309	0	0	0.295	0.492
PABPC4L	EEF1A2	ENSP00000463233	ENSP00000217182	0	0	0	0.144	0.314	0	0.203	0.491
CYGB	RASL12	ENSP00000293230	ENSP00000220062	0	0	0	0.136	0.05	0	0.429	0.49
PCOLCE2	COL6A3	ENSP00000295992	ENSP00000295550	0	0	0	0.061	0	0	0.479	0.49
NKX2-3	FOXF1	ENSP00000342828	ENSP00000262426	0	0	0	0	0.111	0	0.449	0.489
COL4A1	BMP3	ENSP00000364979	ENSP00000282701	0	0	0	0	0.404	0	0.178	0.489
LEP	NTS	ENSP00000312652	ENSP00000256010	0	0	0	0	0	0	0.486	0.486
COL4A2	FBLN1	ENSP00000353654	ENSP00000331544	0	0	0	0.212	0.063	0	0.36	0.486
POSTN	FBLN1	ENSP00000369071	ENSP00000331544	0	0	0	0.141	0	0	0.427	0.486
TBX18	PRRX1	ENSP00000358677	ENSP00000239461	0	0	0	0.209	0.19	0	0.261	0.485
PRMT8	SCN2A	ENSP00000372067	ENSP00000364586	0	0	0	0.119	0	0	0.437	0.483
ID4	GFRA1	ENSP00000367972	ENSP00000347591	0	0	0	0.098	0	0	0.45	0.482
FOXF1	SIX1	ENSP00000262426	ENSP00000247182	0	0	0	0	0	0	0.481	0.481
POU4F1	IRX1	ENSP00000366413	ENSP00000305244	0	0	0	0.062	0	0	0.468	0.48
SIX3	CCND1	ENSP00000260653	ENSP00000227507	0	0	0	0	0	0	0.479	0.479
COL3A1	PRRX1	ENSP00000304408	ENSP00000239461	0	0	0	0.346	0	0	0.234	0.478
NRP2	PDPN	ENSP00000353582	ENSP00000294489	0	0	0	0.065	0	0	0.464	0.478
NTRK3	GFRA1	ENSP00000354207	ENSP00000347591	0	0	0	0	0	0	0.477	0.477
VGLL3	PCDH18	ENSP00000381436	ENSP00000355082	0	0	0	0.074	0.083	0	0.434	0.477
COL1A1	MXRA5	ENSP00000225964	ENSP00000217939	0	0	0	0.385	0.082	0	0.147	0.476
MUC16	EEF1A2	ENSP00000381008	ENSP00000217182	0	0	0	0	0	0	0.475	0.475
GABRR3	IMPG1	ENSP00000481321	ENSP00000358966	0	0	0	0	0	0	0.475	0.475
EPHA3	PDZRN3	ENSP00000337451	ENSP00000263666	0	0	0	0.334	0.102	0	0.191	0.474
WNT7B	CCND1	ENSP00000341032	ENSP00000227507	0	0	0	0	0	0	0.474	0.474
TEAD1	EGFR	ENSP00000435233	ENSP00000275493	0	0	0	0.336	0	0	0.24	0.474
FOXF2	SIX1	ENSP00000259806	ENSP00000247182	0	0	0	0.088	0	0	0.446	0.473
COL1A2	IBSP	ENSP00000297268	ENSP00000226284	0	0	0	0	0	0	0.473	0.473
CHAT	NTS	ENSP00000337103	ENSP00000256010	0	0	0	0	0	0	0.473	0.473
ROS1	EGFR	ENSP00000357494	ENSP00000275493	0	0	0	0.076	0.172	0	0.343308	0.473
SCN2A	HBZ	ENSP00000364586	ENSP00000252951	0	0	0	0	0	0	0.473	0.473
GABRR3	LEP	ENSP00000481321	ENSP00000312652	0	0	0	0	0	0	0.473	0.473
FGF13	CCND1	ENSP00000322390	ENSP00000227507	0	0	0	0	0	0	0.472	0.472
SNAI2	IRF6	ENSP00000380034	ENSP00000355988	0	0	0	0	0	0	0.471	0.471
CDH11	TWIST1	ENSP00000268603	ENSP00000242261	0	0	0	0.108	0	0	0.429	0.469
MSLN	LBP	ENSP00000372313	ENSP00000217407	0	0	0	0	0	0	0.469	0.469
MUC16	EGFR	ENSP00000381008	ENSP00000275493	0	0	0	0.065	0.099	0	0.421	0.469
NRP2	SLIT3	ENSP00000353582	ENSP00000332164	0	0	0	0	0	0	0.465	0.465
POU4F1	SIX3	ENSP00000366413	ENSP00000260653	0	0	0	0.063	0	0	0.452	0.465
EGFR	COL1A1	ENSP00000275493	ENSP00000225964	0	0	0	0.172	0.099	0	0.339	0.464
COL4A1	PCOLCE2	ENSP00000364979	ENSP00000295992	0	0	0	0.076	0	0	0.443	0.463
TMEM100	PALMD	ENSP00000465638	ENSP00000263174	0	0	0	0.079	0	0	0.44	0.463
FBLN1	MXRA5	ENSP00000331544	ENSP00000217939	0	0	0	0.178	0.051	0	0.366	0.462
PRRX1	SIX4	ENSP00000239461	ENSP00000216513	0	0	0	0	0	0	0.46	0.46
SIX1	PRRX1	ENSP00000247182	ENSP00000239461	0	0	0	0.116	0	0	0.413	0.46
TFF2	DCLK1	ENSP00000291526	ENSP00000255448	0	0	0	0	0	0	0.46	0.46
KRT19	TWIST1	ENSP00000355124	ENSP00000242261	0	0	0	0.061	0	0	0.448	0.46
COL1A2	PRRX1	ENSP00000297268	ENSP00000239461	0	0	0	0.352	0	0	0.199	0.459
PTPRQ	NAV3	ENSP00000482885	ENSP00000381007	0	0	0	0.063	0	0	0.446	0.459
COL4A2	EGFR	ENSP00000353654	ENSP00000275493	0	0	0	0.295	0	0	0.262	0.458
MOGAT1	FABP4	ENSP00000406674	ENSP00000256104	0	0	0	0.05	0	0	0.453	0.458
RTL1	IGF2	ENSP00000435342	ENSP00000391826	0	0	0	0.061	0	0	0.447	0.458
SIM1	SIX3	ENSP00000358210	ENSP00000260653	0	0	0	0	0	0	0.456	0.456
ROBO1	EPHA3	ENSP00000420321	ENSP00000337451	0	0	0	0.095	0.093	0	0.39	0.456
GLI2	WNT7B	ENSP00000390436	ENSP00000341032	0	0	0	0.061	0.084	0	0.416	0.453
COL4A2	BMP3	ENSP00000353654	ENSP00000282701	0	0	0	0	0.404	0	0.118	0.452
POSTN	LAMA4	ENSP00000369071	ENSP00000230538	0	0	0	0.253	0	0	0.296	0.452
SPARCL1	MEGF10	ENSP00000414856	ENSP00000274473	0	0	0	0.126	0	0	0.398	0.451
ADIPOQ	AZGP1	ENSP00000389814	ENSP00000292401	0	0	0	0	0	0	0.45	0.45
POSTN	TBX18	ENSP00000369071	ENSP00000358677	0	0	0	0.121	0	0	0.398	0.448
PRRX1	COL1A1	ENSP00000239461	ENSP00000225964	0	0	0	0.299	0	0	0.243	0.447
KCNQ3	GABRD	ENSP00000373648	ENSP00000367848	0	0	0	0.174	0	0	0.358	0.447
GLI2	FOXF2	ENSP00000390436	ENSP00000259806	0	0	0	0.076	0.108	0	0.384	0.447
TWIST1	COL1A1	ENSP00000242261	ENSP00000225964	0	0	0	0.172	0	0	0.357	0.445
TENM2	C2orf54	ENSP00000429430	ENSP00000373586	0	0	0	0	0	0	0.444	0.444
FRZB	CCND1	ENSP00000295113	ENSP00000227507	0	0	0	0	0	0	0.441	0.441
WNT7B	EGFR	ENSP00000341032	ENSP00000275493	0	0	0	0.07	0.195	0	0.313	0.441
NTRK3	TWIST1	ENSP00000354207	ENSP00000242261	0	0	0	0.049	0	0	0.437	0.441
KCNQ3	LRRC38	ENSP00000373648	ENSP00000365253	0	0	0	0	0	0	0.438	0.438
HOXD9	HOXA11	ENSP00000249499	ENSP00000006015	0	0	0	0.298	0	0	0.202048	0.437
KRT19	COL1A1	ENSP00000355124	ENSP00000225964	0	0	0	0.155	0	0	0.359	0.436
ANO1	CCND1	ENSP00000347454	ENSP00000227507	0	0	0	0.088	0	0	0.405	0.434
PDPN	EGFR	ENSP00000294489	ENSP00000275493	0	0	0	0.055	0	0	0.425	0.433
NKX2-3	FOXF2	ENSP00000342828	ENSP00000259806	0	0	0	0	0.111	0	0.387	0.432
ANXA8	ASS1	ENSP00000478026	ENSP00000361471	0	0	0	0	0	0	0.431	0.431
NT5E	FABP4	ENSP00000257770	ENSP00000256104	0	0	0	0	0	0	0.43	0.43
EFEMP1	COL4A1	ENSP00000378058	ENSP00000364979	0	0	0	0.31	0.063	0	0.188	0.43
ASPG	F9	ENSP00000450040	ENSP00000218099	0	0	0	0.076	0	0	0.407	0.429
EPHA3	SLIT3	ENSP00000337451	ENSP00000332164	0	0	0	0	0.123	0	0.375	0.428
IGF2	COL1A1	ENSP00000391826	ENSP00000225964	0	0	0	0.182	0	0	0.33	0.428
HOXB6	MYF6	ENSP00000420009	ENSP00000228641	0	0	0	0	0.059	0	0.415	0.426
FGF13	NT5E	ENSP00000322390	ENSP00000257770	0	0	0	0	0	0	0.425	0.425
CD207	CCL19	ENSP00000386378	ENSP00000308815	0	0	0	0.076	0	0	0.404	0.425
CDH11	PRRX1	ENSP00000268603	ENSP00000239461	0	0	0	0.337	0	0	0.168	0.424
COL1A2	TWIST1	ENSP00000297268	ENSP00000242261	0	0	0	0.153	0	0	0.347	0.424
CD1B	CCL19	ENSP00000357150	ENSP00000308815	0	0	0	0	0	0	0.425	0.424
COL4A2	TNN	ENSP00000353654	ENSP00000239462	0	0	0	0.061	0	0	0.41	0.423
COLEC12	PDPN	ENSP00000383115	ENSP00000294489	0	0	0	0.121	0	0	0.37	0.423
SMOC2	COL3A1	ENSP00000346537	ENSP00000304408	0	0	0	0.333	0	0	0.169	0.422
KRT19	BMP3	ENSP00000355124	ENSP00000282701	0	0	0	0	0	0	0.421	0.422
GLI2	TWIST1	ENSP00000390436	ENSP00000242261	0	0	0	0.095	0.133	0	0.322	0.422
FGF13	COL1A1	ENSP00000322390	ENSP00000225964	0	0	0	0	0.069	0	0.404	0.421
SPARCL1	POSTN	ENSP00000414856	ENSP00000369071	0	0	0	0.162	0	0	0.338	0.421
SNAI2	EDN3	ENSP00000380034	ENSP00000337128	0	0	0	0	0	0	0.42	0.42
PTPRQ	GJB2	ENSP00000482885	ENSP00000372295	0	0	0	0	0	0	0.421	0.42
RD3	SIX1	ENSP00000355969	ENSP00000247182	0	0	0	0	0	0	0.419	0.419
TMEM47	MEGF10	ENSP00000275954	ENSP00000274473	0	0	0	0.122	0	0	0.364	0.418
CHAT	CRH	ENSP00000337103	ENSP00000276571	0	0	0	0	0	0	0.419	0.418
POU4F1	LMX1B	ENSP00000366413	ENSP00000347684	0	0	0	0.061	0.086	0	0.376	0.418
FGFR2	EGFR	ENSP00000410294	ENSP00000275493	0	0	0	0.062	0.17	0	0.28626	0.417
COL1A2	MGP	ENSP00000297268	ENSP00000228938	0	0	0	0.206	0	0	0.295	0.416
IRX1	HOXA13	ENSP00000305244	ENSP00000222753	0	0	0	0.049	0.28	0	0.216	0.416
HOXD8	HOXA13	ENSP00000315949	ENSP00000222753	0	0	0	0.141	0.185	0	0.20819	0.416
POSTN	IRX1	ENSP00000369071	ENSP00000305244	0	0	0	0.068	0	0	0.4	0.416
FGF23	COL1A1	ENSP00000237837	ENSP00000225964	0	0	0	0	0.069	0	0.396	0.414
PRRX1	HOXA13	ENSP00000239461	ENSP00000222753	0	0	0	0.062	0.083	0	0.374	0.414
SLIT3	NRP1	ENSP00000332164	ENSP00000265371	0	0	0	0.081	0	0	0.388	0.414
GFRA1	EDN3	ENSP00000347591	ENSP00000337128	0	0	0	0	0	0	0.415	0.414
VGLL3	FGF13	ENSP00000381436	ENSP00000322390	0	0	0	0	0	0	0.414	0.414
IGF2	MYF6	ENSP00000391826	ENSP00000228641	0	0	0	0.061	0	0	0.401	0.413
TDRD1	EEF1A2	ENSP00000251864	ENSP00000217182	0	0	0	0.062	0.374	0	0.08	0.412
COL1A2	TDRD1	ENSP00000297268	ENSP00000251864	0	0	0	0	0.412	0	0	0.412
MSLNL	MSLN	ENSP00000441381	ENSP00000372313	0	0	0	0.338	0	0	0.123057	0.412
PTGIS	HOXA13	ENSP00000244043	ENSP00000222753	0	0	0	0	0.05	0	0.405	0.411
CHAT	EGFR	ENSP00000337103	ENSP00000275493	0	0	0	0	0.381	0	0.088	0.411
PCDH18	CDH11	ENSP00000355082	ENSP00000268603	0	0	0	0.298	0	0	0.17094	0.411
FBLN1	COL6A3	ENSP00000331544	ENSP00000295550	0	0	0	0.157	0.063	0	0.313	0.41
KRT19	FOXF1	ENSP00000355124	ENSP00000262426	0	0	0	0	0	0	0.41	0.41
ASS1	LMX1B	ENSP00000361471	ENSP00000347684	0	0	0	0	0	0	0.411	0.41
NTRK3	CHAT	ENSP00000354207	ENSP00000337103	0	0	0	0.061	0	0	0.397	0.409
COL4A1	EGFR	ENSP00000364979	ENSP00000275493	0	0	0	0.23	0	0	0.262	0.408
COLEC12	COL1A2	ENSP00000383115	ENSP00000297268	0	0	0	0.379	0	0	0.085	0.408
MSLN	KRT19	ENSP00000372313	ENSP00000355124	0	0	0	0.118	0	0	0.355	0.407
CCND1	COL1A1	ENSP00000227507	ENSP00000225964	0	0	0	0.152	0	0	0.329	0.406
MGP	COL1A1	ENSP00000228938	ENSP00000225964	0	0	0	0.116	0	0	0.356	0.406
IRX1	HOXA11	ENSP00000305244	ENSP00000006015	0	0	0	0.049	0.28	0	0.203	0.406
POSTN	MXRA5	ENSP00000369071	ENSP00000217939	0	0	0	0.351	0	0	0.122	0.406
VGLL3	MRGPRF	ENSP00000381436	ENSP00000309782	0	0	0	0.081	0	0	0.378	0.404
FOXF1	HOXB5	ENSP00000262426	ENSP00000239151	0	0	0	0.098	0.111	0	0.316	0.403
SOSTDC1	FRZB	ENSP00000304930	ENSP00000295113	0	0	0	0.097	0	0	0.366	0.403
EFEMP1	MGP	ENSP00000378058	ENSP00000228938	0	0	0	0.195	0	0	0.287	0.402
SNAI2	COL4A1	ENSP00000380034	ENSP00000364979	0	0	0	0.276	0	0	0.208	0.402
FGFR2	IRF6	ENSP00000410294	ENSP00000355988	0	0	0	0.085	0	0	0.373	0.402
EFEMP1	COL4A2	ENSP00000378058	ENSP00000353654	0	0	0	0.289	0.063	0	0.171	0.4
SNAI2	COL4A2	ENSP00000380034	ENSP00000353654	0	0	0	0.308	0	0	0.168	0.4
IGF2	ADIPOQ	ENSP00000391826	ENSP00000389814	0	0	0	0	0	0	0.4	0.4
